# Supplementary material
Source: ML conference proceedings conference paper supplement (https://proceedings.mlr.press/v28/yang13e.html)
Supplement: Supplementary file 1 [file yang13e-supp.pdf]

---

# Supplementary Material

---

**Wenzhuo Yang**

A0096049@NUS.EDU.SG

Department of Mechanical Engineering, National University of Singapore, Singapore 117576

**Huan Xu**

MPEXUH@NUS.EDU.SG

Department of Mechanical Engineering, National University of Singapore, Singapore 117576

## 1. Notation Table

|                               |                                                                                       |
|-------------------------------|---------------------------------------------------------------------------------------|
| $[m]$                         | The set $\{1, \dots, m\}$                                                             |
| $g$                           | A subset of $[m]$                                                                     |
| $g^c$                         | The complement of $g$ , $g^c = [m] \setminus g$                                       |
| $\mathbf{I}$                  | The identity matrix                                                                   |
| $\mathbf{X}$                  | The sample matrix $\mathbf{X} \in \mathcal{R}^{n \times m}$                           |
| $\mathbf{X}_i$                | The $i$ th column of $\mathbf{X}$                                                     |
| $\boldsymbol{\beta}$          | Vector $\boldsymbol{\beta} \in \mathcal{R}^m$                                         |
| $\beta_i$                     | The $i$ th element of $\boldsymbol{\beta}$                                            |
| $\boldsymbol{\beta}_g$        | The vector whose $i$ th element is $\beta_i$ if $i \in g$ or 0 otherwise              |
| $\boldsymbol{\Delta}^{(i)}$   | The $i$ th disturbance matrix                                                         |
| $\boldsymbol{\Delta}_j^{(i)}$ | The $j$ th column of $\boldsymbol{\Delta}^{(i)}$                                      |
| $\boldsymbol{\Delta}_g$       | The matrix whose $i$ th column is $\boldsymbol{\Delta}_i$ if $i \in g$ or 0 otherwise |
| $\mathbf{W}_i$                | Matrix $\mathbf{W}_i \in \mathcal{R}^{m \times m}$                                    |
| $\text{vec}(\cdot)$           | The operator vectorizing a matrix by stacking its columns                             |
| $\ \mathbf{X}\ _p$            | The $\ell_p$ -norm of $\text{vec}(\mathbf{X})$ , $\ \text{vec}(\mathbf{X})\ _p$       |

## 2. Proofs in Section 2

To prove the corollaries in Section 2, we give the following lemma.

**Lemma 1.** *If any two different groups  $g_p$  and  $g_q$  in  $G_i$  in the uncertainty set  $U$  (4) are non-overlapping for  $i = 1, \dots, t$ , which means  $g_p \cap g_q = \emptyset$ , then the optimization problem (5) is equivalent to*

$$\min_{\boldsymbol{\beta} \in \mathcal{R}^m} \{ \|\mathbf{y} - \mathbf{X}\boldsymbol{\beta}\|_p + \sum_{i=1}^t \sum_{g \in G_i} c_g \|(\mathbf{W}_i \boldsymbol{\beta})_g\|_p^* \} \quad (1)$$

*Proof.* Since any two different groups  $g_p$  and  $g_q$  in  $G_i$  are non-overlapping, we have

$$\sum_{i=1}^t \max_{\forall g \in G_i, \|\boldsymbol{\alpha}_g^{(i)}\|_p \leq c_g} \boldsymbol{\alpha}^{(i)\top} \mathbf{W}_i \boldsymbol{\beta} = \sum_{i=1}^t \sum_{g \in G_i} \max_{\|\boldsymbol{\alpha}_g^{(i)}\|_p \leq c_g} \boldsymbol{\alpha}_g^{(i)\top} (\mathbf{W}_i \boldsymbol{\beta})_g = \sum_{i=1}^t \sum_{g \in G_i} c_g \|(\mathbf{W}_i \boldsymbol{\beta})_g\|_p^* \quad (2)$$

Hence the lemma holds. □

By using Theorem 3 and Lemma 1, we have

1. *Proof of Corollary 1:*  $G_1 = \{[m]\}$  satisfies the condition of Lemma 1, so we have

$$\sum_{i=1}^t \sum_{g \in G_i} c_g \|(\mathbf{W}_i \boldsymbol{\beta})_g\|_p^* = \sum_{g \in G_1} c \| \boldsymbol{\beta}_g \|_2^* = c \| \boldsymbol{\beta} \|_2. \quad (3)$$

2. *Proof of Corollary 2:*  $G_1 = \{\{1\}, \dots, \{m\}\}$  satisfies the condition of Lemma 1, then

$$\sum_{i=1}^t \sum_{g \in G_i} c_g \|(\mathbf{W}_i \boldsymbol{\beta})_g\|_p^* = \sum_{g \in G_1} c_g \| \boldsymbol{\beta}_g \|_p^* = \sum_{i=1}^m c_i | \beta_i |. \quad (4)$$

3. *Proof of Corollary 3:*  $G_1 = \{g_1, \dots, g_k\}$  satisfies the condition of Lemma 1, so we have

$$\sum_{i=1}^t \sum_{g \in G_i} c_g \|(\mathbf{W}_i \boldsymbol{\beta})_g\|_p^* = \sum_{i=1}^k c_{g_i} \| \boldsymbol{\beta}_{g_i} \|_p^*. \quad (5)$$

4. *Proof of Theorem 2:*  $G_i = \{g_i, g_i^c\}$  satisfies the condition of Lemma 1 and  $c_{g_i^c} = 0$ , so that

$$\sum_{i=1}^t \sum_{g \in G_i} c_g \|(\mathbf{W}_i \boldsymbol{\beta})_g\|_p^* = \sum_{i=1}^k (c_{g_i} \| \boldsymbol{\beta}_{g_i} \|_p^* + c_{g_i^c} \| \boldsymbol{\beta}_{g_i^c} \|_p^*) = \sum_{i=1}^k c_{g_i} \| \boldsymbol{\beta}_{g_i} \|_p^*. \quad (6)$$

5. *Proof of Corollary 4:* The dual problem of the optimization problem

$$\min_{\sum \mathbf{v}_{g_i} = \boldsymbol{\beta}, \text{supp}(\mathbf{v}_{g_i}) \subseteq g_i} \sum_{i=1}^k c_{g_i} \| \mathbf{v}_{g_i} \|_p^*$$

can be formulated as

$$\begin{aligned} & \max_{\boldsymbol{\alpha}} \min_{\forall i, \text{supp}(\mathbf{v}_{g_i}) \subseteq g_i} \left\{ \sum_{i=1}^k c_{g_i} \| \mathbf{v}_{g_i} \|_p^* - \boldsymbol{\alpha}^\top \sum_{i=1}^k \mathbf{v}_{g_i} + \boldsymbol{\alpha}^\top \boldsymbol{\beta} \right\} \\ &= \max_{\boldsymbol{\alpha}} \left\{ \boldsymbol{\alpha}^\top \boldsymbol{\beta} + \min_{\forall i, \text{supp}(\mathbf{v}_{g_i}) \subseteq g_i} \left\{ \sum_{i=1}^k c_{g_i} \| \mathbf{v}_{g_i} \|_p^* - \boldsymbol{\alpha}^\top \mathbf{v}_{g_i} \right\} \right\} \\ &= \max_{\boldsymbol{\alpha}} \left\{ \boldsymbol{\alpha}^\top \boldsymbol{\beta} - \max_{\forall i, \text{supp}(\mathbf{v}_{g_i}) \subseteq g_i} \left\{ \sum_{i=1}^k \boldsymbol{\alpha}_{g_i}^\top \mathbf{v}_{g_i} - c_{g_i} \| \mathbf{v}_{g_i} \|_p^* \right\} \right\} \\ &= \max_{\forall i, \| \boldsymbol{\alpha}_{g_i} \| \leq c_{g_i}} \boldsymbol{\alpha}^\top \boldsymbol{\beta} \end{aligned} \quad (7)$$

Since the constraints in the primal problem satisfy Slater's condition, the strong duality holds. From the duality and the condition in Corollary 4, we have

$$\begin{aligned} & \min_{\boldsymbol{\beta} \in \mathcal{R}^m} \{ \| \mathbf{y} - \mathbf{X} \boldsymbol{\beta} \|_p + \sum_{i=1}^t \max_{\forall g \in G_i, \| \boldsymbol{\alpha}_g^{(i)} \|_p \leq c_g} \boldsymbol{\alpha}^{(i)\top} \mathbf{W}_i \boldsymbol{\beta} \} \\ &= \min_{\boldsymbol{\beta} \in \mathcal{R}^m} \{ \| \mathbf{y} - \mathbf{X} \boldsymbol{\beta} \|_p + \max_{\forall g \in G_1, \| \boldsymbol{\alpha}_g \|_p \leq c_g} \boldsymbol{\alpha}^\top \boldsymbol{\beta} \} \\ &= \min_{\boldsymbol{\beta} \in \mathcal{R}^m} \{ \| \mathbf{y} - \mathbf{X} \boldsymbol{\beta} \|_p + \min_{\sum \mathbf{v}_{g_i} = \boldsymbol{\beta}, \text{supp}(\mathbf{v}_{g_i}) \subseteq g_i} \sum_{i=1}^k c_{g_i} \| \mathbf{v}_{g_i} \|_p^* \}. \end{aligned} \quad (8)$$

6. *Proof of Corollary 5:* From Theorem 2 and Lemma 1, we have

$$\begin{aligned}
 & \sum_{i=1}^t \sum_{g \in G_i} c_g \|(\mathbf{W}_i \boldsymbol{\beta})_g\|_p^* \\
 &= \sum_{g \in G_1} c_g \|\boldsymbol{\beta}_g\|_p^* + \sum_{g \in G_2} c'_g \|(\mathbf{W}_2 \boldsymbol{\beta})_g\|_p^* \\
 &= \sum_{i=1}^m c_i |\beta_i| + \sum_{i=1}^{m-1} c'_i |\beta_i - \beta_{i+1}|.
 \end{aligned} \tag{9}$$

7. *Proof of Corollary 6:* By using the proofs of Corollary 1 and Corollary 3, we can obtain Corollary 6.

8. *Proof of Corollary 7:*  $G_1 = \{\{1\}, \dots, \{m\}\}$  satisfies the condition of Lemma 1. Since  $t = 1$ ,  $c_{\{i\}} = \lambda$  and  $\mathbf{W}_1 = \mathbf{D}$ , we have

$$\sum_{i=1}^t \sum_{g \in G_i} c_g \|(\mathbf{W}_i \boldsymbol{\beta})_g\|_p^* = \sum_{g \in G_1} \lambda \|(\mathbf{D} \boldsymbol{\beta})_g\|_p^* = \sum_{i=1}^m \lambda |(\mathbf{D} \boldsymbol{\beta})_i| = \lambda \|\mathbf{D} \boldsymbol{\beta}\|_1. \tag{10}$$

### 3. Proofs in Section 3

#### 3.1. Proof of Theorem 4:

From the definition of  $\hat{U}$ , we have

$$\begin{aligned}
 & \max_{\boldsymbol{\Delta} \in \hat{U}} \|\mathbf{y} - (\mathbf{X} + \boldsymbol{\Delta}) \boldsymbol{\beta}\|_p \\
 &= \max_{\mathbf{c} \in \mathcal{Z}} \max_{\forall i, \forall g \in G_i, \|\boldsymbol{\Delta}_g^{(i)}\|_p \leq c_g} \|\mathbf{y} - (\mathbf{X} + \boldsymbol{\Delta}) \boldsymbol{\beta}\|_p \\
 &= \|\mathbf{y} - \mathbf{X} \boldsymbol{\beta}\|_p + \max_{\mathbf{c} \in \mathcal{Z}} \sum_{i=1}^t \max_{\forall g \in G_i, \|\boldsymbol{\alpha}_g^{(i)}\|_p \leq c_g} \boldsymbol{\alpha}^{(i)\top} \mathbf{W}_i \boldsymbol{\beta} \\
 &= \|\mathbf{y} - \mathbf{X} \boldsymbol{\beta}\|_p + \max_{\mathbf{c} | \mathbf{c} \geq 0; f_i(\mathbf{c}) \leq 0} \sum_{i=1}^t \max_{\forall g \in G_i, \|\boldsymbol{\alpha}_g^{(i)}\|_p \leq c_g} \boldsymbol{\alpha}^{(i)\top} \mathbf{W}_i \boldsymbol{\beta} \\
 &= \|\mathbf{y} - \mathbf{X} \boldsymbol{\beta}\|_p + \min_{\boldsymbol{\lambda} \in \mathcal{R}_+^q, \boldsymbol{\kappa} \in \mathcal{R}_+^k} \max_{\mathbf{c} \in \mathcal{R}^k} \left\{ \sum_{i=1}^t \max_{\forall g \in G_i, \|\boldsymbol{\alpha}_g^{(i)}\|_p \leq c_g} \boldsymbol{\alpha}^{(i)\top} \mathbf{W}_i \boldsymbol{\beta} + \boldsymbol{\kappa}^\top \mathbf{c} - \sum_{i=1}^q \lambda_i f_i(\mathbf{c}) \right\} \\
 &= \|\mathbf{y} - \mathbf{X} \boldsymbol{\beta}\|_p + \min_{\boldsymbol{\lambda} \in \mathcal{R}_+^q, \boldsymbol{\kappa} \in \mathcal{R}_+^k} v(\boldsymbol{\lambda}, \boldsymbol{\kappa}, \boldsymbol{\beta})
 \end{aligned} \tag{11}$$

Hence we establish the theorem by taking minimum over  $\boldsymbol{\beta}$  on both sides. Now we show the optimization problem is convex and tractable. we first prove that  $v(\boldsymbol{\lambda}, \boldsymbol{\kappa}, \boldsymbol{\beta})$  is a convex function of  $\boldsymbol{\lambda}, \boldsymbol{\kappa}, \boldsymbol{\beta}$ . Since

$$v(\boldsymbol{\lambda}, \boldsymbol{\kappa}, \boldsymbol{\beta}) = \max_{\substack{\mathbf{c} \in \mathcal{R}^k, \\ \forall i, g \in G_i, \|\boldsymbol{\alpha}_g^{(i)}\|_p \leq c_g}} \left\{ \sum_{i=1}^t \boldsymbol{\alpha}^{(i)\top} \mathbf{W}_i \boldsymbol{\beta} + \boldsymbol{\kappa}^\top \mathbf{c} - \sum_{i=1}^q \lambda_i f_i(\mathbf{c}) \right\} = \max_{\substack{\mathbf{c} \in \mathcal{R}^k, \\ \forall i, g \in G_i, \|\boldsymbol{\alpha}_g^{(i)}\|_p \leq c_g}} \mu(\boldsymbol{\lambda}, \boldsymbol{\kappa}, \boldsymbol{\beta}). \tag{12}$$

For fixed  $\mathbf{c}$  and  $\boldsymbol{\alpha}_g^{(i)}$ ,  $\mu(\boldsymbol{\lambda}, \boldsymbol{\kappa}, \boldsymbol{\beta})$  is a linear function of  $\boldsymbol{\lambda}, \boldsymbol{\kappa}, \boldsymbol{\beta}$ . Thus  $v(\boldsymbol{\lambda}, \boldsymbol{\kappa}, \boldsymbol{\beta})$  is convex, which implies the optimization problem is convex. By choosing parameter  $\gamma$ , the optimization problem can be reformulated as

$$\begin{aligned}
 & \min \quad \|\mathbf{y} - \mathbf{X} \boldsymbol{\beta}\|_p \\
 & \text{s.t.} \quad v(\boldsymbol{\lambda}, \boldsymbol{\kappa}, \boldsymbol{\beta}) \leq \gamma \\
 & \quad \boldsymbol{\lambda} \in \mathcal{R}_+^p, \boldsymbol{\kappa} \in \mathcal{R}_+^k, \boldsymbol{\beta} \in \mathcal{R}^m
 \end{aligned}$$

To show the problem is tractable, it suffices to construct a polynomial-time *separation oracle* for the feasible set  $S$  (Grötschel et al. (Grötschel et al., 1988)). A separation oracle is a routine such that for a solution  $(\boldsymbol{\lambda}_0, \boldsymbol{\kappa}_0, \boldsymbol{\beta}_0)$ ,

it can find, in polynomial time, that (a) whether  $(\boldsymbol{\lambda}_0, \boldsymbol{\kappa}_0, \boldsymbol{\beta}_0)$  belongs to  $S$  or not; and (b) if  $(\boldsymbol{\lambda}_0, \boldsymbol{\kappa}_0, \boldsymbol{\beta}_0) \notin S$ , a hyperplane that separates  $(\boldsymbol{\lambda}_0, \boldsymbol{\kappa}_0, \boldsymbol{\beta}_0)$  with  $S$ .

To verify the feasibility of  $(\boldsymbol{\lambda}_0, \boldsymbol{\kappa}_0, \boldsymbol{\beta}_0)$ , notice that  $(\boldsymbol{\lambda}_0, \boldsymbol{\kappa}_0, \boldsymbol{\beta}_0) \in S$  if and only if the optimal value of the optimization problem (12) is smaller than or equal to  $\gamma$ , which can be verified in polynomial time. If  $(\boldsymbol{\lambda}_0, \boldsymbol{\kappa}_0, \boldsymbol{\beta}_0) \notin S$ , then by solving (12), we can find in polynomial time  $\mathbf{c}_0, \boldsymbol{\alpha}_0^{(i)}$  such that

$$\sum_{i=1}^t \boldsymbol{\alpha}_0^{(i)\top} \mathbf{W}_i \boldsymbol{\beta} + \boldsymbol{\kappa}^\top \mathbf{c}_0 - \sum_{i=1}^q \lambda_i f_i(\mathbf{c}_0) > \gamma.$$

which is the hyperplane separates  $(\boldsymbol{\lambda}_0, \boldsymbol{\kappa}_0, \boldsymbol{\beta}_0)$  with  $S$ .

### 3.2. Extension of Corollary 8:

**Theorem 1.** Let  $g_1, \dots, g_t$  be  $t$  groups such that  $\bigcup_{i=1}^t g_i = [m]$ , and  $\bar{\boldsymbol{\Delta}}_i$  be a  $n \times m$  matrix whose columns except the  $i$ th one are all zero. Suppose that  $\mathbf{c}_{g_i}$  is a  $|g_i|$  dimension vector whose elements give the norm bound of  $\bar{\boldsymbol{\Delta}}_j$  for  $j \in g_i$ , e.g.  $\|\bar{\boldsymbol{\Delta}}_j\|_2 \leq c_{g_i}^j$ , and  $\mathbf{c} = (\mathbf{c}_{g_1}, \dots, \mathbf{c}_{g_t})$ . We define the uncertainty set as  $\hat{U} = \{\sum_{i=1}^t \sum_{j \in g_i} \bar{\boldsymbol{\Delta}}_j | \exists \mathbf{c} \text{ such that } \mathbf{c} \geq 0 \text{ and } \|\mathbf{c}_{g_i}\|_q^* \leq s_i, \forall i \in [t]; \|\bar{\boldsymbol{\Delta}}_j\|_2 \leq c_{g_i}^j, \forall i \in [t], \forall j \in g_i\}$ , then the equivalent linear regularized regression problem is

$$\min_{\boldsymbol{\beta} \in \mathcal{R}^m} \{\|\mathbf{y} - \mathbf{X}\boldsymbol{\beta}\|_p + \sum_{i=1}^t s_i \|\boldsymbol{\beta}_{g_i}\|_q\},$$

where  $\|\cdot\|_q^*$  is the dual norm of  $\|\cdot\|_q$ .

*Proof.* From Theorem 3 and Theorem 4, we have

$$\begin{aligned} & \min_{\lambda \in \mathcal{R}_+, \boldsymbol{\kappa} \in \mathcal{R}_+^m} v(\lambda, \boldsymbol{\kappa}, \boldsymbol{\beta}) \\ &= \min_{\lambda \in \mathcal{R}_+, \boldsymbol{\kappa} \in \mathcal{R}_+^m} \max_{\mathbf{c} \in \mathcal{R}^m} \left\{ \sum_{j=1}^t \sum_{i \in g_j} (\kappa_i + |\beta_i|) c_i - \right. \\ & \quad \left. \sum_{i=1}^t \lambda_i (\|\mathbf{c}_{g_i}\|_q^* + s_i) \right\}. \end{aligned}$$

Define  $\mathbf{r}_{g_i}$  as the vector whose elements are  $\kappa_j + |\beta_j|$  for  $j \in g_i$ , then the equation above is equivalent to

$$\min_{\lambda \in \mathcal{R}_+, \boldsymbol{\kappa} \in \mathcal{R}_+^m, \|\mathbf{r}_{g_i}\|_q \leq \lambda_i, \forall i \in [t]} \boldsymbol{\lambda}^\top \mathbf{s} = \sum_{i=1}^t s_i \|\boldsymbol{\beta}_{g_i}\|_q,$$

which establishes the theorem.  $\square$

## 4. Proofs in Section 5

Recall that the uncertainty set considered in this paper is

$$U = \{\boldsymbol{\Delta}^{(1)} \mathbf{W}_1 + \dots + \boldsymbol{\Delta}^{(t)} \mathbf{W}_t | \forall i, \forall g \in G_i, \|\boldsymbol{\Delta}_g^{(i)}\|_2 \leq c_g\} \quad (13)$$

where  $G_i$  is the set of the groups of  $\boldsymbol{\Delta}^{(i)}$  and  $c_g$  gives the bound of  $\boldsymbol{\Delta}_g^{(i)}$  for group  $g$ . We denote  $\bar{G}_i$  and  $\bar{G}_i^c$  as the set  $\{g \in G_i | c_g \neq 0\}$  and  $G_i - \bar{G}_i$ , respectively. In this theorem, we restrict our discussion to the case that  $\mathbf{W}_i = \mathbf{I}$  for  $i = 1, \dots, t$  and the bound  $c_g$  of  $\boldsymbol{\Delta}_g^{(i)}$  for each group  $g$  equals  $\sqrt{n}c_n$  or 0, so the uncertainty set can be rewritten as

$$U = \{\boldsymbol{\Delta}^{(1)} + \dots + \boldsymbol{\Delta}^{(t)} | \forall i, \forall g \in \bar{G}_i, \|\boldsymbol{\Delta}_g^{(i)}\|_2 \leq \sqrt{n}c_n\} \quad (14)$$

Note that the constraint  $\|\Delta\|_2 \leq c$  can be reformulated as the union of several element-wise constraints. Denote  $\mathcal{D} = \{\mathbf{D} \mid \sum_i \sum_j D_{ij}^2 = c^2, D_{ij} \geq 0\}$  (we call an element  $\mathbf{D} \in \mathcal{D}$  *decomposition*), then we have

$$\{\Delta \mid \|\Delta\|_2 \leq c\} = \bigcup_{\mathbf{D} \in \mathcal{D}} \{\Delta \mid \forall i, j, |\Delta_{ij}| \leq D_{ij}\}.$$

Similarly, the uncertainty set  $\{\Delta \mid \|\Delta_g\|_2 \leq c\}$  is equivalent to

$$\bigcup_{\mathbf{D} \in \mathcal{D}_g} \{\Delta \mid \forall i, \forall j \in g, |\Delta_{ij}| \leq D_{ij}\},$$

where  $\mathcal{D}_g = \{\mathbf{D} \mid \sum_i \sum_{j \in g} D_{ij}^2 = c^2, D_{ij} \geq 0\}$ . After the constraints of the uncertainty sets are decomposed into element-wise constraints, the set  $\{\mathbf{X} + \Delta^{(1)} + \dots + \Delta^{(t)}\}$  can also be represented by an element-wise way. The notation is a little complicated so we first consider three simple cases:

- One uncertainty set  $\Delta$  such that  $\|\Delta\|_2 \leq c$ : for fixed  $\mathbf{D} \in \mathcal{D}$ , we have  $\{X_{ij} + \Delta_{ij}\} = [X_{ij} - D_{ij}, X_{ij} + D_{ij}]$ .
- Two uncertainty sets  $\Delta^{(1)}$  and  $\Delta^{(2)}$  such that  $\|\Delta^{(1)}\|_2 \leq c$  and  $\|\Delta^{(2)}\|_2 \leq c$ : for fixed  $\mathbf{D}^{(1)} \in \mathcal{D}$  and  $\mathbf{D}^{(2)} \in \mathcal{D}$ , we have  $\{X_{ij} + \Delta_{ij}^{(1)} + \Delta_{ij}^{(2)}\} = [X_{ij} - D_{ij}^{(1)} - D_{ij}^{(2)}, X_{ij} + D_{ij}^{(1)} + D_{ij}^{(2)}]$ .
- One uncertainty set  $\Delta$  and two overlapping groups  $p$  and  $q$  such that  $\|\Delta_p\|_2 \leq c$  and  $\|\Delta_q\|_2 \leq c$ : for fixed  $\mathbf{P} \in \mathcal{D}_p$  and  $\mathbf{Q} \in \mathcal{D}_q$ , we have

$$\{X_{ij} + \Delta_{ij}\} = \begin{cases} [X_{ij} - P_{ij}, X_{ij} + P_{ij}] & j \in p, j \notin q \\ [X_{ij} - Q_{ij}, X_{ij} + Q_{ij}] & j \notin p, j \in q \\ [X_{ij} - \min\{P_{ij}, Q_{ij}\}, X_{ij} + \min\{P_{ij}, Q_{ij}\}] & j \in p, j \in q \end{cases}$$

Thus, if the decomposition  $\mathbf{D} \in \mathcal{D}_g$  for each  $\Delta_g^{(i)}$  is fixed, we have  $\{X_{ij} + \Delta_{ij}^{(1)} + \dots + \Delta_{ij}^{(t)}\} = [X_{ij} - \gamma_{ij}, X_{ij} + \gamma_{ij}]$  where  $\gamma_{ij}$  is determined by the decomposition  $\mathbf{D}$ s. Since the number of the elements of  $\Delta_g^{(i)}$  is less than or equal to  $mn$  ( $m$  is the feature dimension and  $n$  is the number of samples), there exists a decomposition  $\mathbf{D}$  for each  $\Delta_g^{(i)}$  such that  $[X_{ij} - \frac{c_n}{\sqrt{m}}, X_{ij} + \frac{c_n}{\sqrt{m}}] \subseteq [X_{ij} - \gamma_{ij}, X_{ij} + \gamma_{ij}]$ . We now prove the theorem.

**Proposition 1.** (Xu et al., 2010) Given a function  $h : \mathcal{R}^{m+1} \mapsto R$  and Borel sets  $Z_1, \dots, Z_n \subseteq \mathcal{R}^{m+1}$ , let

$$P_n = \{\mu \in P \mid \forall S \subseteq \{1, \dots, n\} : \mu(\bigcup_{i \in S} Z_i) \geq |S|/n\}.$$

The following holds

$$\frac{1}{n} \sum_{i=1}^n \sup_{(b_i, \mathbf{r}_i) \in Z_i} h(b_i, \mathbf{r}_i) = \sup_{\mu \in P_n} \int_{\mathcal{R}^{m+1}} h(b_i, \mathbf{r}_i) d\mu(b_i, \mathbf{r}_i).$$

**Step 1:** Using the notation above, we first give the following corollary:

**Corollary 1.** Given  $\mathbf{y} \in \mathcal{R}^n$ ,  $\mathbf{X} \in \mathcal{R}^{n \times m}$ , the following equation holds for any  $\beta \in \mathcal{R}^m$ ,

$$\|\mathbf{y} - \mathbf{X}\beta\|_2 + \sqrt{\frac{n}{m}} c_n + \sum_{i=1}^t \max_{\forall g \in \bar{G}_i, \|\alpha_g^{(i)}\|_2 \leq \sqrt{nc_n}} \alpha^{(i)\top} \beta = \sup_{\mu \in \hat{P}(n)} \sqrt{n \int_{\mathcal{R}^{m+1}} (b' - \mathbf{r}'^\top \beta)^2 d\mu(b', \mathbf{r}')} \quad (15)$$

Here,

$$\begin{aligned} \hat{P}(n) &= \bigcup_{\mathcal{S} = \{\mathbf{D}_g^{(i)}\} \mid \mathbf{D}_g^{(i)} \in \mathcal{D}_g, \forall i, g \in \bar{G}_i} P_n(\mathbf{X}, \mathcal{S}, \mathbf{y}, c_n) \\ P_n(\mathbf{X}, \mathcal{S}, \mathbf{y}, c_n) &= \{\mu \in P \mid Z_i = [y_i - \frac{c_n}{\sqrt{m}}, y_i + \frac{c_n}{\sqrt{m}}] \times \prod_{j=1}^m [X_{ij} - \gamma_{ij}, X_{ij} + \gamma_{ij}]; \\ &\quad \forall S \subseteq \{1, \dots, n\} : \mu(\bigcup_{i \in S} Z_i) \geq |S|/n\}, \end{aligned}$$

where  $\gamma_{ij}$  depends on the “decomposition” set  $\mathcal{S}$ .

*Proof.* The right hand side of Equation (15) is equal to

$$\sup_{S=\{\mathbf{D}_g^{(i)}\}|\forall i,g\in\bar{G}_i,\mathbf{D}_g^{(i)}\in\mathcal{D}_g} \left\{ \sup_{\mu\in P_n(\mathbf{X},\mathcal{S},\mathbf{y},c_n)} \sqrt{n \int_{\mathcal{R}^{m+1}} (b' - \mathbf{r}'^\top \boldsymbol{\beta})^2 d\mu(b', \mathbf{r}')} \right\}.$$

From Theorem 2, we know that the left hand side is equal to

$$\begin{aligned} & \sup_{\forall i,g\in\bar{G}_i,\|\boldsymbol{\delta}_y\|_2\leq\sqrt{\frac{n}{m}}c_n,\|\boldsymbol{\Delta}_g^{(i)}\|_2\leq\sqrt{n}c_n} \|\mathbf{y} + \boldsymbol{\delta}_y - (\mathbf{X} + \boldsymbol{\Delta})\boldsymbol{\beta}\|_2 \\ = & \sup_{\forall i,g\in\bar{G}_i,\mathbf{D}_g^{(i)}\in\mathcal{D}_g} \left\{ \sup_{\|\boldsymbol{\delta}_y\|_2\leq\sqrt{\frac{n}{m}}c_n,|\boldsymbol{\Delta}_g^{(i)}|\leq\mathbf{D}_g^{(i)}} \|\mathbf{y} + \boldsymbol{\delta}_y - (\mathbf{X} + \boldsymbol{\Delta})\boldsymbol{\beta}\|_2 \right\} \\ = & \sup_{\forall i,g\in\bar{G}_i,\mathbf{D}_g^{(i)}\in\mathcal{D}_g} \sqrt{\sum_{i=1}^n \sup_{(b_i,\mathbf{r}_i)\in[y_i-c_n/\sqrt{m},y_i+c_n/\sqrt{m}]\times\prod_{j=1}^m[X_{ij}-\gamma_{ij},X_{ij}+\gamma_{ij}]} (b_i - \mathbf{r}_i^\top \boldsymbol{\beta})}. \end{aligned}$$

Furthermore, applying Proposition 1 yields

$$\begin{aligned} & \sqrt{\sum_{i=1}^n \sup_{(b_i,\mathbf{r}_i)\in[y_i-c_n/\sqrt{m},y_i+c_n/\sqrt{m}]\times\prod_{j=1}^m[X_{ij}-\gamma_{ij},X_{ij}+\gamma_{ij}]} (b_i - \mathbf{r}_i^\top \boldsymbol{\beta})} \\ = & \sqrt{\sup_{\mu\in P(\mathbf{X},\mathcal{S},\mathbf{y},c_n)} n \int_{\mathcal{R}^{m+1}} (b' - \mathbf{r}'^\top \boldsymbol{\beta})^2 d\mu(b', \mathbf{r}')} \\ = & \sup_{\mu\in P(\mathbf{X},\mathcal{S},\mathbf{y},c_n)} \sqrt{n \int_{\mathcal{R}^{m+1}} (b' - \mathbf{r}'^\top \boldsymbol{\beta})^2 d\mu(b', \mathbf{r}')} \end{aligned}$$

which proves the corollary.  $\square$

**Step 2:** As (Xu et al., 2010), we consider the following kernel estimator given samples  $(b_i, \mathbf{r}_i)_{i=1}^n$ ,

$$\begin{aligned} h_n(b, \mathbf{r}) &= (nc^{m+1})^{-1} \sum_{i=1}^n K\left(\frac{b - b_i, \mathbf{r} - \mathbf{r}_i}{c}\right) \\ &\text{where } K(\mathbf{x}) = I_{[-1,1]^{m+1}}(\mathbf{x})/2^{m+1}, \text{ and } c = \frac{c_n}{\sqrt{m}}. \end{aligned} \tag{16}$$

Observe that the estimated distribution above belongs to the set of distributions

$$\begin{aligned} P_n(\mathbf{X}, \mathcal{S}, \mathbf{y}, c_n) &= \left\{ \mu \in P \mid Z_i = \left[ y_i - \frac{c_n}{\sqrt{m}}, y_i + \frac{c_n}{\sqrt{m}} \right] \times \prod_{j=1}^m [X_{ij} - \gamma_{ij}, X_{ij} + \gamma_{ij}]; \right. \\ &\quad \left. \forall S \subseteq \{1, \dots, n\} : \mu\left(\bigcup_{i\in S} Z_i\right) \geq |S|/n \right\} \end{aligned}$$

and hence belongs to  $\hat{P}(n) = \bigcup_{S=\{\mathbf{D}_g^{(i)}\}|\mathbf{D}_g^{(i)}\in\mathcal{D}_g,\forall i,g\in\bar{G}_i} P_n(\mathbf{X}, \mathcal{S}, \mathbf{y}, c_n)$ .

**Step 3:** Combining the last two steps, and using the fact that  $\int_{b,\mathbf{r}} |h_n(b, \mathbf{r}) - h(b, \mathbf{r})| d(b, \mathbf{r})$  goes to zero almost surely when  $c \downarrow 0$  and  $nc^{m+1} \uparrow \infty$  or equivalently  $c_n \downarrow 0$  and  $nc_n^{m+1} \uparrow \infty$ . Now we prove consistency of robust regression.

*Proof.* Let  $f(\cdot)$  be the true probability density function of the samples, and  $\hat{\mu}_n$  be the estimated distribution using Equation (16) given  $S_n$  and  $c_n$ , and denote its density function as  $f_n(\cdot)$ . The condition that  $\|\boldsymbol{\beta}(c_n, S_n)\|_2 \leq H$  almost surely and  $P$  has a bounded support implies that there exists a universal constant  $C$  such that

$$\max_{b,\mathbf{r}} (b - \mathbf{r}^\top \boldsymbol{\beta}(c_n, S_n))^2 \leq C$$

almost surely.

By Corollary 1 and  $\hat{\mu}_n \in \hat{P}(n)$ , we have

$$\begin{aligned}
 & \sqrt{\int_{b,\mathbf{r}} (b - \mathbf{r}^\top \boldsymbol{\beta}(c_n, S_n))^2 d\hat{\mu}_n(b, \mathbf{r})} \\
 & \leq \sup_{\mu \in \hat{P}(n)} \sqrt{\int_{b,\mathbf{r}} (b - \mathbf{r}^\top \boldsymbol{\beta}(c_n, S_n))^2 d\mu_n(b, \mathbf{r})} \\
 & = \frac{\sqrt{n}}{n} \sqrt{\sum_{i=1}^n (b_i - \mathbf{r}_i^\top \boldsymbol{\beta}(c_n, S_n))^2} + \sum_{i=1}^t \max_{\forall g \in \bar{G}_i, \|\boldsymbol{\alpha}_g^{(i)}\|_2 \leq c_n} \boldsymbol{\alpha}^{(i)\top} \boldsymbol{\beta} + \frac{1}{\sqrt{m}} c_n \\
 & \leq \frac{\sqrt{n}}{n} \sqrt{\sum_{i=1}^n (b_i - \mathbf{r}_i^\top \boldsymbol{\beta}(P))^2} + \sum_{i=1}^t \max_{\forall g \in \bar{G}_i, \|\boldsymbol{\alpha}_g^{(i)}\|_2 \leq c_n} \boldsymbol{\alpha}^{(i)\top} \boldsymbol{\beta} + \frac{1}{\sqrt{m}} c_n
 \end{aligned}$$

Notice that,  $\sum_{i=1}^t \max_{\forall g \in \bar{G}_i, \|\boldsymbol{\alpha}_g^{(i)}\|_2 \leq c_n} \boldsymbol{\alpha}^{(i)\top} \boldsymbol{\beta} + \frac{1}{\sqrt{m}} c_n$  converges to 0 as  $c_n \downarrow 0$  almost surely, so the right-hand side converges to  $\sqrt{\int_{b,\mathbf{r}} (b - \mathbf{r}^\top \boldsymbol{\beta}(P))^2 dP(b, \mathbf{r})}$  as  $n \uparrow \infty$  and  $c_n \downarrow 0$  almost surely. Furthermore, we have

$$\begin{aligned}
 & \int_{b,\mathbf{r}} (b - \mathbf{r}^\top \boldsymbol{\beta}(c_n, S_n))^2 dP(b, \mathbf{r}) \\
 & \leq \int_{b,\mathbf{r}} (b - \mathbf{r}^\top \boldsymbol{\beta}(c_n, S_n))^2 d\hat{\mu}_n(b, \mathbf{r}) + \max_{b,\mathbf{r}} (b - \mathbf{r}^\top \boldsymbol{\beta}(c_n, S_n))^2 \cdot \int_{b,\mathbf{r}} |f_n(b, \mathbf{r}) - f(b, \mathbf{r})| d(b, \mathbf{r}) \\
 & \leq \int_{b,\mathbf{r}} (b - \mathbf{r}^\top \boldsymbol{\beta}(c_n, S_n))^2 d\hat{\mu}_n(b, \mathbf{r}) + C \int_{b,\mathbf{r}} |f_n(b, \mathbf{r}) - f(b, \mathbf{r})| d(b, \mathbf{r}),
 \end{aligned}$$

where the last inequality follows from the definition of  $C$ . Notice that  $\int_{b,\mathbf{r}} |f_n(b, \mathbf{r}) - f(b, \mathbf{r})| d(b, \mathbf{r})$  goes to zero almost surely when  $c_n \downarrow 0$  and  $nc_n^{m+1} \uparrow \infty$ . Hence the theorem follows.  $\square$

As mentioned in the paper, the assumption that  $\|\boldsymbol{\beta}(c_n, S_n)\|_2 \leq H$  in Theorem 7 can be removed, then we have

**Theorem 2.** *Let  $\{c_n\}$  converge to zero sufficiently slowly. Then*

$$\begin{aligned}
 & \lim_{n \rightarrow \infty} \sqrt{\int_{b,\mathbf{r}} (b_i - \mathbf{r}_i^\top \boldsymbol{\beta}(c_n, S_n))^2 dP(b, \mathbf{r})} = \\
 & \sqrt{\int_{b,\mathbf{r}} (b_i - \mathbf{r}_i^\top \boldsymbol{\beta}(P))^2 dP(b, \mathbf{r})}
 \end{aligned}$$

almost surely.

We now prove this theorem. We establish the following lemma first.

**Lemma 2.** *Partition the support of  $P$  as  $V_1, \dots, V_T$  such that the  $l_\infty$  radius of each set is less than  $\frac{c_n}{\sqrt{m}}$ . If a distribution  $\mu$  satisfies*

$$\mu(V_t) = \#\{(b_i, \mathbf{r}_i^\top) \in V_t\}/n; \quad t = 1, \dots, T, \quad (17)$$

then  $\mu \in \hat{P}(n)$ .

*Proof.* Let  $Z_i = [y_i - \frac{c_n}{\sqrt{m}}, y_i + \frac{c_n}{\sqrt{m}}] \times \prod_{j=1}^m [X_{ij} - \frac{c_n}{\sqrt{m}}, X_{ij} + \frac{c_n}{\sqrt{m}}]$ , recall that  $X_{ij}$  is the  $j$ th element of  $\mathbf{r}_i$ . Notice that the  $l_\infty$  radius of  $V_t$  is less than  $\frac{c_n}{\sqrt{m}}$ , we have

$$(b_i, \mathbf{r}_i^\top) \in V_t \Rightarrow V_t \subseteq Z_i.$$

Therefore, for any  $S \subseteq \{1, \dots, n\}$ , the following holds

$$\begin{aligned} & \mu\left(\bigcup_{i \in S} Z_i\right) \geq \mu\left(\bigcup V_t \mid \exists i \in S : (b_i, \mathbf{r}_i^\top) \in V_t\right) \\ &= \sum_{t \mid \exists i \in S : (b_i, \mathbf{r}_i^\top) \in V_t} \mu(V_t) = \sum_{t \mid \exists i \in S : (b_i, \mathbf{r}_i^\top) \in V_t} \#((b_i, \mathbf{r}_i^\top) \in V_t) / n \geq |S| / n. \end{aligned}$$

Hence  $\mu \in P_n(\mathbf{X}, \mathcal{S}, \mathbf{y}, c_n)$  which implies  $\mu \in \hat{P}(n)$ .  $\square$

Partition the support of  $P$  into  $T$  subsets such that the  $l_\infty$  radius of each set is less than  $\frac{c_n}{\sqrt{m}}$ . Denote  $\tilde{P}(n)$  as the set of probability measures satisfying Equation (17). Hence  $\tilde{P}(n) \subseteq \hat{P}(n)$  by Lemma 1. Further notice that there exists a universal constant  $K$  such that  $\|\beta(c_n, S_n)\|_2 \leq K/c_n$  due to the fact that the square loss of the solution  $\beta = 0$  is bounded by a constant only depends on the support of  $P$ . Thus, there exists a constant  $C$  such that  $\max_{b, \mathbf{r}} (b - \mathbf{r}^\top \beta(c_n, S_n))^2 \leq C/c_n^2$ . Follow a similar argument as the proof of Theorem 6, we have

$$\begin{aligned} & \sup_{\mu \in \tilde{P}(n)} \sqrt{\int_{b, \mathbf{r}} (b - \mathbf{r}^\top \beta(c_n, S_n))^2 d\mu_n(b, \mathbf{r})} \\ & \leq \frac{\sqrt{n}}{n} \sqrt{\sum_{i=1}^n (b_i - \mathbf{r}_i^\top \beta(P))^2} + \sum_{i=1}^t \max_{\forall g \in \tilde{G}_i, \|\alpha_g^{(i)}\|_2 \leq c_n} \alpha^{(i)\top} \beta + \frac{1}{\sqrt{m}} c_n \end{aligned} \quad (18)$$

and

$$\begin{aligned} & \int_{b, \mathbf{r}} (b - \mathbf{r}^\top \beta(c_n, S_n))^2 dP(b, \mathbf{r}) \\ & \leq \inf_{\mu_n \in \tilde{P}(n)} \left\{ \int_{b, \mathbf{r}} (b - \mathbf{r}^\top \beta(c_n, S_n))^2 d\mu_n(b, \mathbf{r}) + \max_{b, \mathbf{r}} (b - \mathbf{r}^\top \beta(c_n, S_n))^2 \cdot \int_{b, \mathbf{r}} |f_{\mu_n}(b, \mathbf{r}) - f(b, \mathbf{r})| d(b, \mathbf{r}) \right\} \\ & \leq \sup_{\mu_n \in \tilde{P}(n)} \int_{b, \mathbf{r}} (b - \mathbf{r}^\top \beta(c_n, S_n))^2 d\mu_n(b, \mathbf{r}) + 2C/c_n^2 \inf_{\mu_n \in \tilde{P}(n)} \int_{b, \mathbf{r}} |f_{\mu_n}(b, \mathbf{r}) - f(b, \mathbf{r})| d(b, \mathbf{r}), \end{aligned}$$

here  $f_\mu$  stands for the density function of a measure  $\mu$ . Notice that  $\tilde{P}(n)$  is the set of distributions satisfying Equation (17), hence  $\inf_{\mu_n \in \tilde{P}(n)} \int_{b, \mathbf{r}} |f_{\mu_n}(b, \mathbf{r}) - f(b, \mathbf{r})| d(b, \mathbf{r})$  is upper-bounded by  $\sum_{t=1}^T |P(V_t) - \#((b_i, \mathbf{r}_i^\top) \in V_t)| / n$ , which goes to zero as  $n$  increases for any fixed  $c_n$ . Therefore,

$$2C/c_n^2 \inf_{\mu_n \in \tilde{P}(n)} \int_{b, \mathbf{r}} |f_{\mu_n}(b, \mathbf{r}) - f(b, \mathbf{r})| d(b, \mathbf{r}) \rightarrow 0,$$

if  $c_n \downarrow 0$  sufficiently slow. Combining this with Inequality (18) proves the theorem.

## References

- Grötschel, Martin, Lovász, Lászlo, and Schrijver, Alexander. *Geometric Algorithms and Combinatorial Optimization*, volume 2. Springer, 1988.
- Xu, H., Caramanis, C., and Mannor, S. Robust regression and lasso. *IEEE Transactions on Information Theory*, 56(7):3561–3574, 2010.
